# Supplementary material for: A polynuclear hetero atom containing molecular organic scaffold to detect Al3+ ion through a fluorescence turn-on response
Source: Royal Society of Chemistry journal article supplement (doi:10.1039/c5ra09693f), 2015-01-01
Supplement: c5ra09693f1.pdf [file c5ra09693f1.pdf]

## SUPPLEMENTARY INFORMATION

### **A polynuclear hetero atom containing molecular organic scaffold to detect $\text{Al}^{3+}$ ion through fluorescence Turn-On response**

Rashid Ali, Syed S. Razi, Priyanka Srivastava, Mohammad Shahid, and Arvind Misra\*

Department of Chemistry, Faculty of Science, Banaras Hindu University, Varanasi – 221 005

UP INDIA

Corresponding author e-mail: arvindmisra2003@yahoo.com; amisra@bhu.ac.in

#### **Contents**

#### **Experimental**

**Figure S1:**  $^1\text{H}$  NMR spectrum of **1** in  $\text{DMSO}-d_6$ .

**Figure S2:** FT-IR spectrum of **1**.

**Figure S3:**  $^1\text{H}$  NMR spectrum of **2** in  $\text{DMSO}-d_6$ .

**Figure S4:**  $^{13}\text{C}$  NMR spectrum of **2** in  $\text{DMSO}-d_6$ .

**Figure S5:** FT-IR spectrum of **2**.

**Figure S6:** HRMS spectrum of **2**.

**Figure S7:**  $^1\text{H}$  NMR spectrum of **3** in  $\text{DMSO}-d_6$ .

**Figure S8:**  $\text{D}_2\text{O}$  exchange  $^1\text{H}$  NMR spectrum of **3** in  $\text{DMSO}-\text{D}_2\text{O}$  (9:1).

**Figure S9:**  $^{13}\text{C}$  NMR spectrum of **3** in  $\text{DMSO}-d_6$ .

**Figure S10:** FT-IR spectrum of **3**.

**Figure S11:** HRMS spectrum of **3**.

**Figure S12:** Mass spectrum of **3**+ $\text{Al}^{3+}$  complex.

**Figure S13:** (a) Absorption and (b) emission spectra of interference studies upon addition of tested metal ions to a solution of **3**+ $\text{Al}^{3+}$  (10  $\mu\text{M}$ ) in HEPES buffer (v/v = 50%, pH 7.04).

**Figure S14:** (a) Emission and Absorption (inset) spectra of **3** (10  $\mu\text{M}$ ) upon interaction of various anions (50.0 equiv) in HEPES buffer (v/v = 50%, pH 7.04). (b) Emission spectra of interference studies upon addition of different anions to a solution of **3**+ $\text{Al}^{3+}$  (10  $\mu\text{M}$ ) in HEPES buffer (v/v = 50%, pH 7.04).

**Figure S15:** FT-IR spectrum of **3**+ $\text{Al}^{3+}$  complex.

**Figure S16:** Stacked FT-IR spectrum of **3** and **3**+ $\text{Al}^{3+}$  complex.

**Table S1:** Photophysical properties of probe **3** and **3+Al<sup>3+</sup>** in different solvents and water gradient systems.

## Experimental

**General:** All the reagents and solvents were purchased from Sigma-Aldrich Chemical Co. Pvt. Ltd. stored in a desiccator under vacuum containing self indicating silica, and used without any further purification. Solvents were purified prior to use. UV-vis absorption spectra were recorded on a Perkin Elmer Lambda-35 UV-vis spectrophotometer using a quartz cuvette (path length = 1cm). Infrared (IR) spectra were recorded in potassium bromide (KBr) on a FT-IR Perkin Elmer Spectrophotometer.  $^1\text{H}$  NMR spectra (chemical shifts in  $\delta$  ppm) were recorded on a JEOL AL 300 FT-NMR (300 MHz) spectrometer, using tetramethylsilane (TMS) as internal standard. Fluorescence spectra were recorded on Varian eclipse Carry spectrofluorometer using a quartz cuvette (path length = 1 cm) at 600 PMT voltage and slit width 5nm/5nm. All the spectroscopic experiments were carried out at room temperature. The stock solution of **3** ( $1 \times 10^{-3}$  M) were prepared in THF and diluted to obtain  $10 \mu\text{M}$  solution in THF/HEPES buffer (v/v = 50%, pH 7.0) for the absorption and fluorescence measurements, respectively. The stock solutions of different metal ions ( $1 \times 10^{-1}$  M) were prepared by dissolving their nitrate salt in water. The cation interaction studies were performed by the addition of 2 equiv. of  $1 \times 10^{-1}$  M of different cations. The absorption and fluorescence titration experiment were performed by the gradual increase of concentration of  $\text{Al}^{3+}$  ( $c = 1 \times 10^{-3}$ ). The cation interference studies were performed by the addition of 50 equiv. of  $1 \times 10^{-1}$  M of different cations. For  $^1\text{H}$  NMR titration experiment solution of probe **3** ( $1 \times 10^{-2}$  M) and  $\text{Al}(\text{NO}_3)_3$  was prepared in  $\text{DMSO}-d_6$ .

The quantum yields were estimated with respect to the quinine sulfate as standard in 0.1M  $\text{H}_2\text{SO}_4$  solution by secondary methods<sup>19</sup>, using equation (1).

$$Q = Q_R \cdot I/I_R \cdot OD_R/OD \cdot n^2/n_R^2 \quad (1)$$

Where  $Q$  is the quantum yield,  $I$  is the integrated intensity,  $OD$  is the optical density, and  $n$  is the refractive index. The subscript  $R$  refers to the reference fluorophore of known quantum yield.

The absorption and fluorescence experimental data were utilized to calculate association constants by Benesi-Hildebrand method<sup>20</sup> (B-H method) employing equations (1) for 1:1 stoichiometries.

$$1/(I - I_o) = 1/(I - I_f) + 1/K(I - I_f)[M] \quad (2)$$

Where  $K$  is the association constant,  $I$  is the absorbance/fluorescence intensity of the free probe **3**,  $I_o$  is the observed absorbance/fluorescence intensity of the **3**- $\text{Al}^{3+}$  complex, and  $I_f$  is the absorbance/fluorescence intensity at saturation level.

The limit of detection (LOD) was estimated by using equation (3).

$$\text{LOD} = 3\sigma / m \quad (3)$$

Where,  $\sigma$  stands for the standard deviation of blank solution of **3** and  $m$  stands for calibration sensitivity toward  $\text{Al}^{3+}$  in THF/HEPES buffer (v/v = 50%, pH 7.04) solution.

**Synthesis of compound 1:** Benzil (1.05 g, 5 mmol) and *m*-hydroxybenzaldehyde (610 mg, 5 mmol) were dissolved in glacial acetic acid (20 mL) at room temperature. To this solution aniline (0.7 mL, 7.5 mmol) was added dropwise. After the addition of ammonium acetate (2.0 g, 26 mmol) the reaction mixture was heated at 110 °C for 4 hr and monitored the reaction on TLC. After completion of reaction, the reaction mixture was cooled to room temperature and poured into the ice-water. The precipitate was filtered, washed with cold water, air dried and recrystallized from ethylacetate to get compound **1** as a light brown color powder. Yield 1.4 g (72%).  $R_f = 0.52$  (Ethylacetate:DCM:: 2:8, v/v).  $^1\text{H}$  NMR (300 MHz,  $\text{DMSO}-d_6$ ):  $\delta$  (ppm): 9.52 (s, 1H, -OH), 7.48-7.62 (d, 2H,  $J = 7.2$  Hz), 7.31-7.16 (m, 13H), 7.04-6.99 (t, 1H,  $J_1 = 7.8$  Hz,  $J_2 = 7.8$  Hz), 6.94 (s, 1H); 6.67 (m, 2H). FT-IR (KBr)  $\nu_{\text{max}}$  (  $\text{cm}^{-1}$ ); 3051, 1597, 1582, 1497, 1482, 1443, 1397, 1376, 1300, 1213, 1178, 1076, 998, 970, 884, 766, 695.

**Synthesis of compound 2:** Compound **2** was synthesized by formylation of compound **1** using Reimer-Tiemann reaction. Compound **1** (1.4 g, 3.65 mmol) was taken in dry ethanol (6 mL) and an aqueous solution (15 mL) of KOH (0.9 g, 16 mmol) was added. The reaction mixture was heated at 70-80°C and then added  $\text{CHCl}_3$  (1.43 g, 0.97 mL, 12 mmol) dropwise for 10-20 min. Once the color of reaction mixture became brine red stirring was continued for 2hr and then at room temperature for 2-3hr. The excess of  $\text{CHCl}_3$  and EtOH were distilled off

and the residue was treated with conc. HCl to make the pH of solution acidic (pH 2-3). After the addition of water (15 mL) precipitate was filtered, washed with water, air dried and purified by column chromatography using dichloromethane as eluent. The solvent was evaporated in vacuum to get compound **2**. Yield=100 mg (7%).  $R_f$  = 0.56 (Ethylacetate:DCM:: 0.5:9.5, v/v),  $^1\text{H}$  NMR (300 MHz, DMSO- $d_6$ ):  $\delta$  (ppm); 10.76 (s, 1H, -OH), 10.19 (s, 1H, -CHO), 7.49-7.47 (d, 2H,  $J$  = 6.3 Hz), 7.35-7.15 (m, 16H).  $^{13}\text{C}$  NMR (75 MHz, DMSO- $d_6$ ):  $\delta$  (ppm); 190.89, 160.19, 144.60, 137.44, 137.27, 136.33, 134.06, 132.34, 131.09, 130.01, 129.30, 129, 128.80, 128.54, 128.21, 126.68, 126.38, 121.65, 118.99, 116.68. FT-IR (KBr)  $\nu_{\text{max}}$  ( $\text{cm}^{-1}$ ); 3415, 3051, 2962, 2924, 2850, 1662, 1626, 1595, 1495, 1461, 1381, 1315, 1261, 1204, 1097, 1025, 966, 914, 874, 805, 701. HRMS (micrOTOF-Q)  $m/z$ : [PHA + H] $^+$  calc. for C<sub>28</sub>H<sub>20</sub>N<sub>2</sub>O<sub>2</sub>, 417.1598; Found 417.1598.

**Synthesis of compound 3:** Compound **2** (100 mg, 0.24 mmol) and 2-aminophenol (27 mg, 0.24 mmol) were taken in acetonitrile (10 mL) and stirred at room temperature for 15 min to get a clear solution. The reaction mixture was refluxed for 2 hr in the presence of iodine (3 mol % of reactant). The red colored precipitate so obtained was filtered, washed with acetonitrile and dried in air to get the desired compound **3** in good yield 90% (110 mg).  $R_f$  = 0.62 (Ethylacetate:DCM:: 0.5:9.5, v/v),  $^1\text{H}$  NMR (300 MHz, DMSO- $d_6$ )  $\delta$  (ppm): 13.79 (1H, -OH, H<sub>b</sub>), 9.71 (1H, -OH, H<sub>a</sub>), 8.89 (s, 1H, -HC=N), 7.50-7.47 (d, 2H,  $J$  = 6.3 Hz), 7.35-7.08 (m, 17H), 7.02-6.99 (d, 1H,  $J$  = 7.8 Hz), 6.94-6.92 (d, 1H,  $J$  = 7.8 Hz), 6.85-6.83 (d, 1H,  $J$  = 6.3 Hz).  $^{13}\text{C}$  NMR (75 MHz, DMSO- $d_6$ )  $\delta$  (ppm): 160.75, 151.30, 145.25, 137.44, 136.71, 134.76, 134.28, 134.09, 132.22, 132.10, 131.30, 130.26, 129.48, 129.20, 128.68, 128.42, 126.92, 126.62, 119.87, 119.26, 118.77, 116.69, 116.27. FT-IR (KBr)  $\nu_{\text{max}}$  ( $\text{cm}^{-1}$ ); 3430, 3061, 2958, 2924, 2852, 1615, 1515, 1506, 1497, 1465, 1352, 1285, 1224, 1163, 1119, 925,

722, 694. HRMS (microTOF-Q)  $m/z$ :  $[3 + H]^+$  calc. for  $C_{34}H_{25}N_3O_2$ , 508.2019; Found 508.2019.

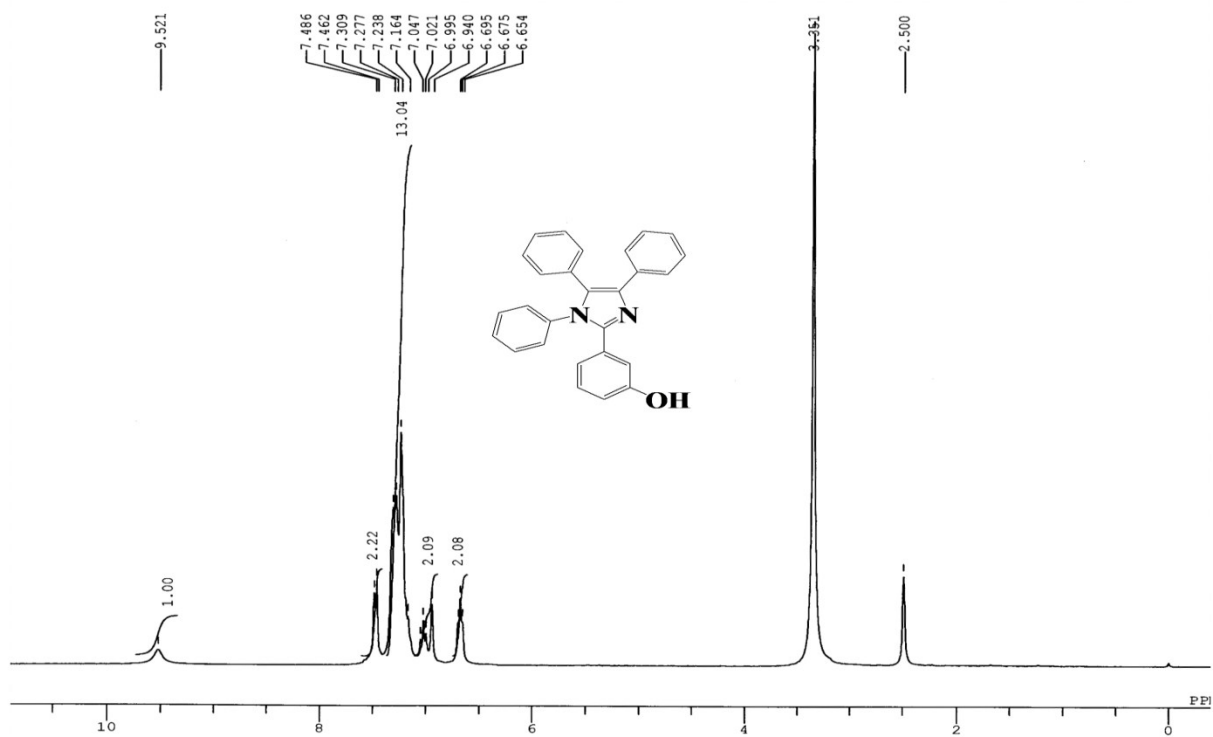

**Figure S1:**  $^1H$  NMR spectrum of **1** in  $DMSO-d_6$ .

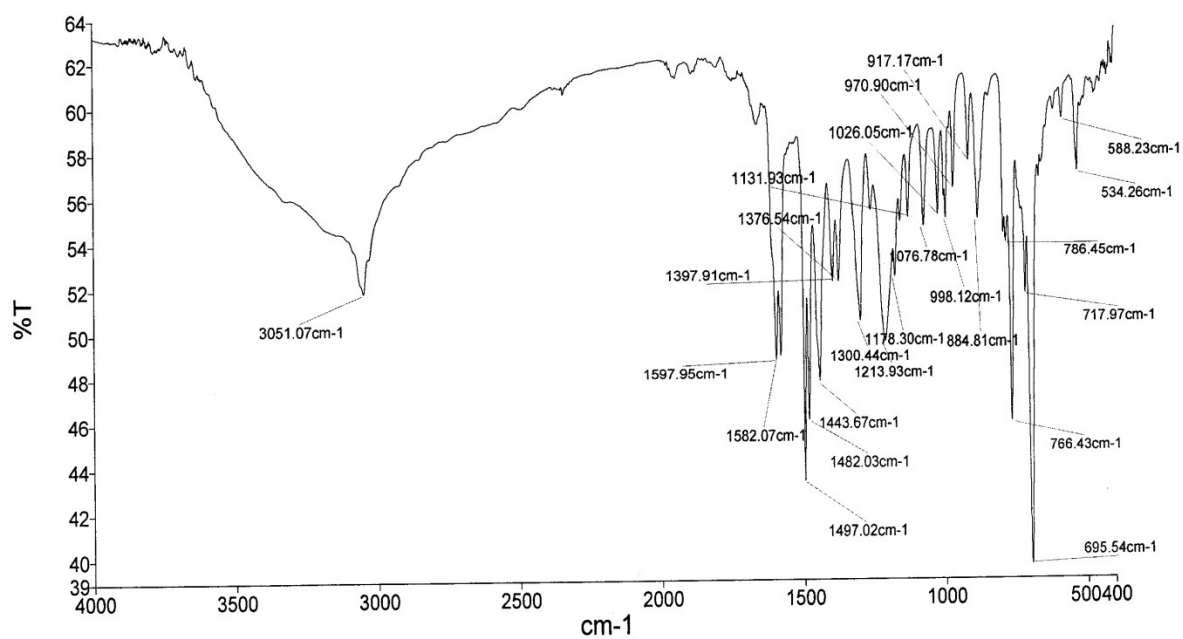

**Figure S2:** FT-IR spectrum of **1**.

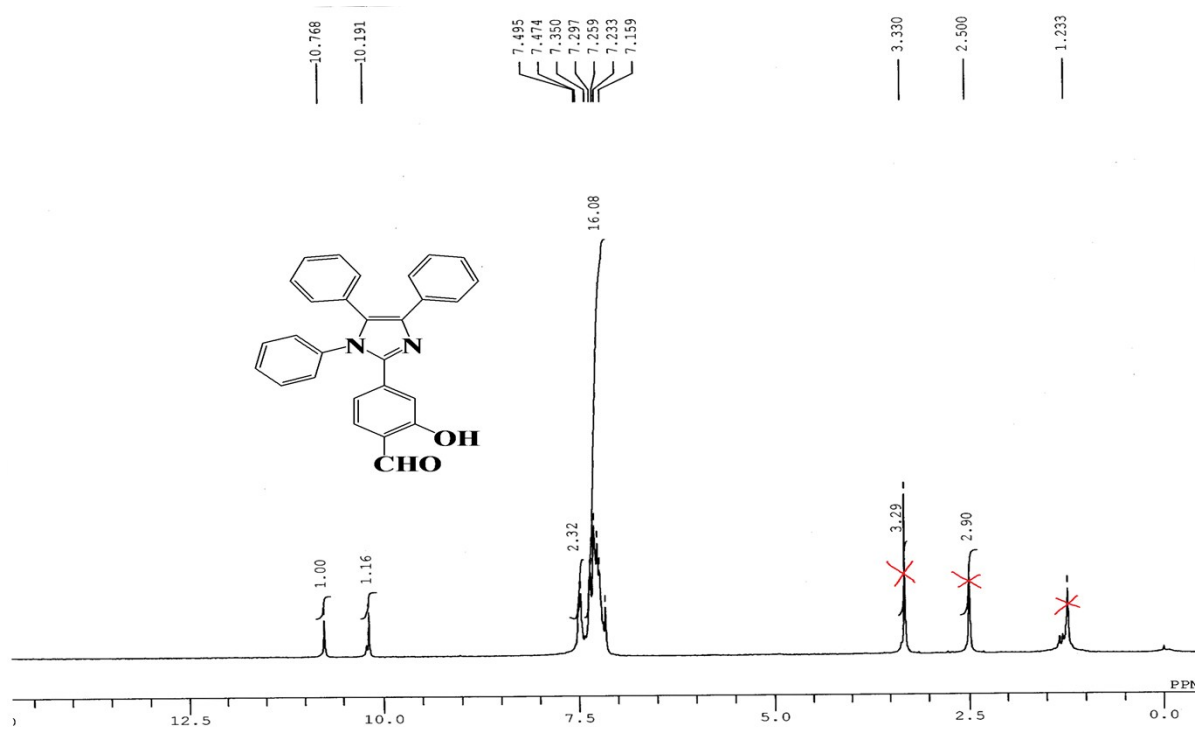

**Figure S3:**  $^1\text{H}$  NMR spectrum of **2** in  $\text{DMSO}-d_6$ .

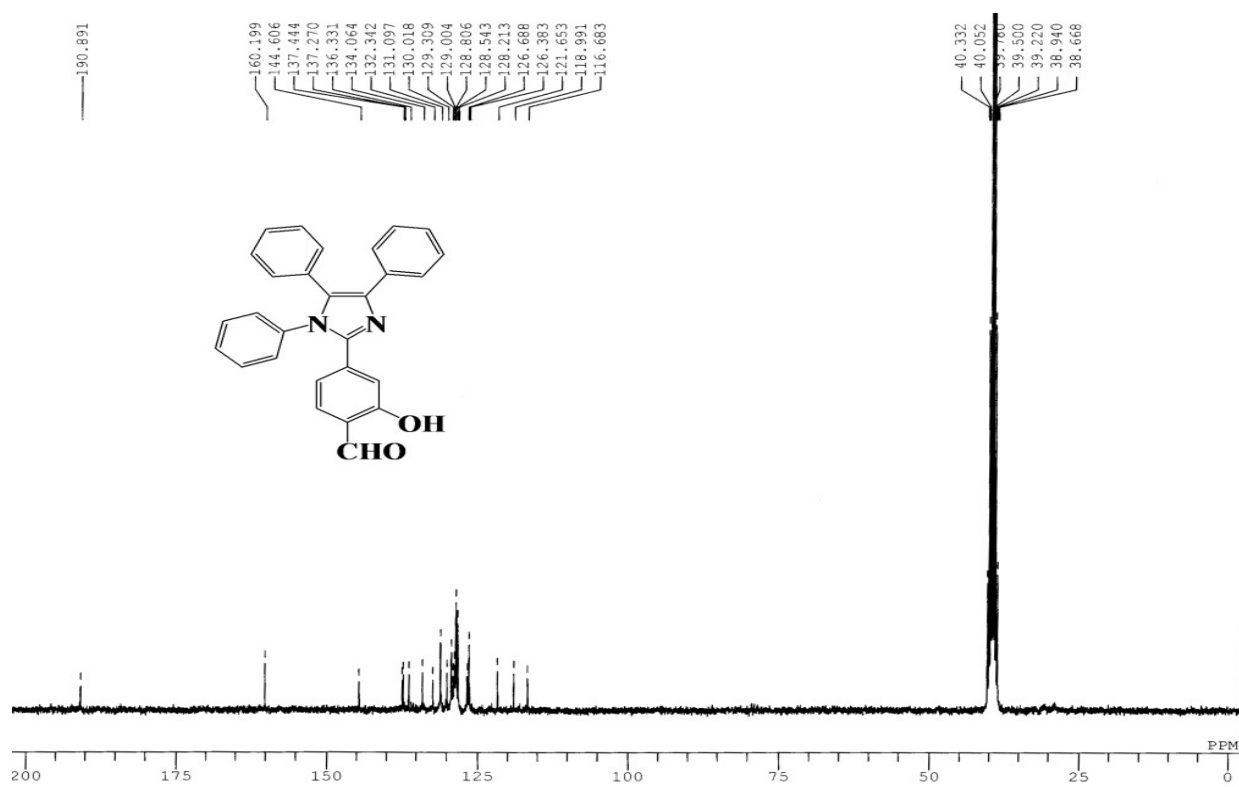

Figure S4: <sup>13</sup>C NMR spectrum of 2 in DMSO-*d*<sub>6</sub>.

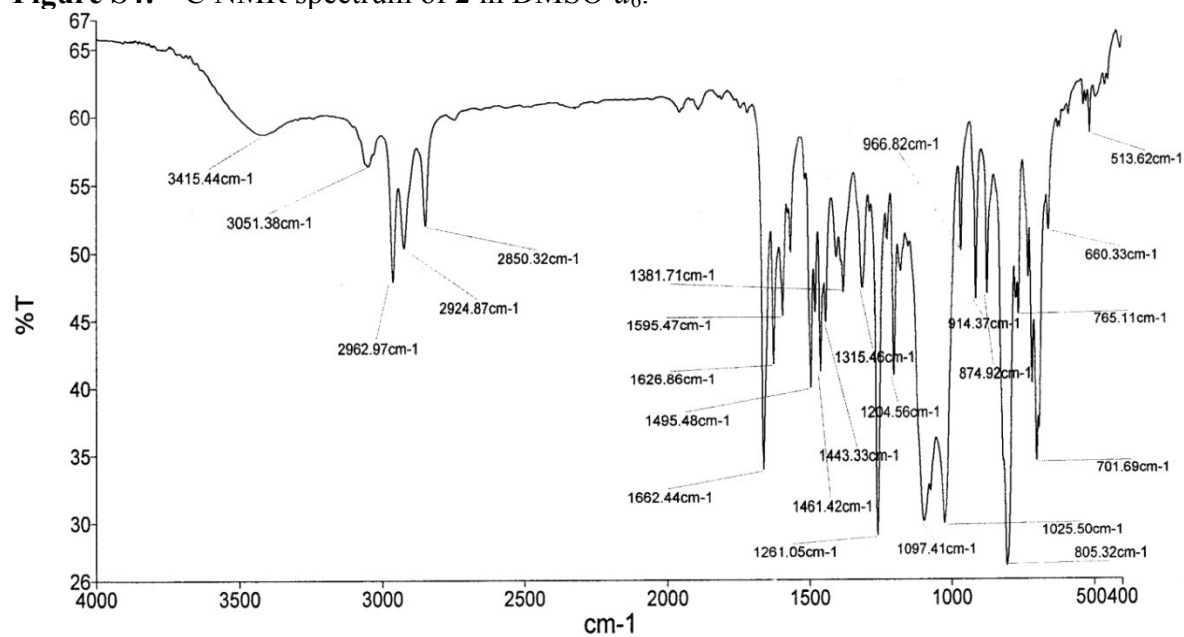

Figure S5: FT-IR spectrum of 2.

Method 04042014\_100-1000\_TOF\_MS(+ve).m  
Sample Name 18(R5)HRMS+

#### Acquisition Parameter

Source Type ESI Ion Polarity Positive Scan Begin 50 m/z Scan End 1500 m/z

#### Generate Molecular Formula Parameter

Formula, min. C<sub>20</sub>H<sub>20</sub>N<sub>2</sub>O<sub>2</sub> Formula, max. C<sub>28</sub>H<sub>25</sub>N<sub>2</sub>O<sub>2</sub> Charge 1  
Measured m/z 417.161 Tolerance 10 ppm  
Nitrogen Rule yes Electron Configuration both

| Sum Formula                                                   | Sigma | m/z      | Err [ppm] | Mean Err [ppm] | Err [mDa] | rdB   | N Rule | e <sup>-</sup> |
|---------------------------------------------------------------|-------|----------|-----------|----------------|-----------|-------|--------|----------------|
| C <sub>28</sub> H <sub>21</sub> N <sub>2</sub> O <sub>2</sub> | 0.014 | 417.1598 | -2.55     | -3.57          | -1.06     | 19.50 | ok     | even           |

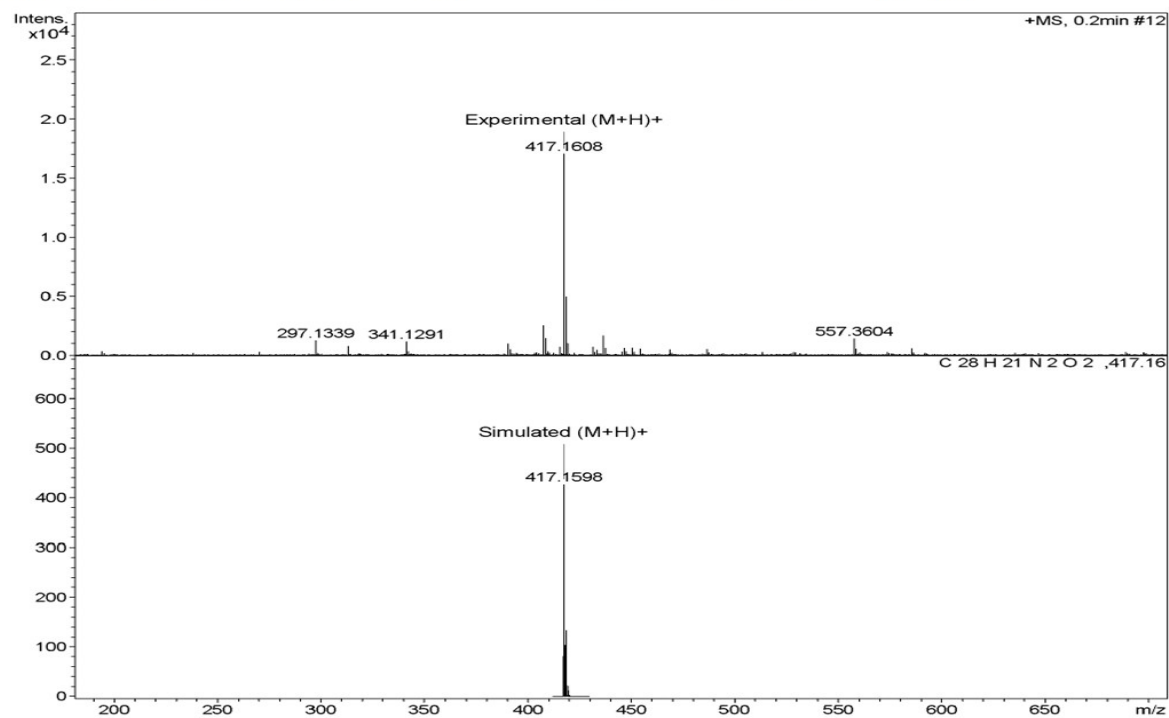

Bruker Daltonics DataAnalysis 3.4

Instrument micrOTOF-Q

Figure S6: HRMS spectrum of 2.

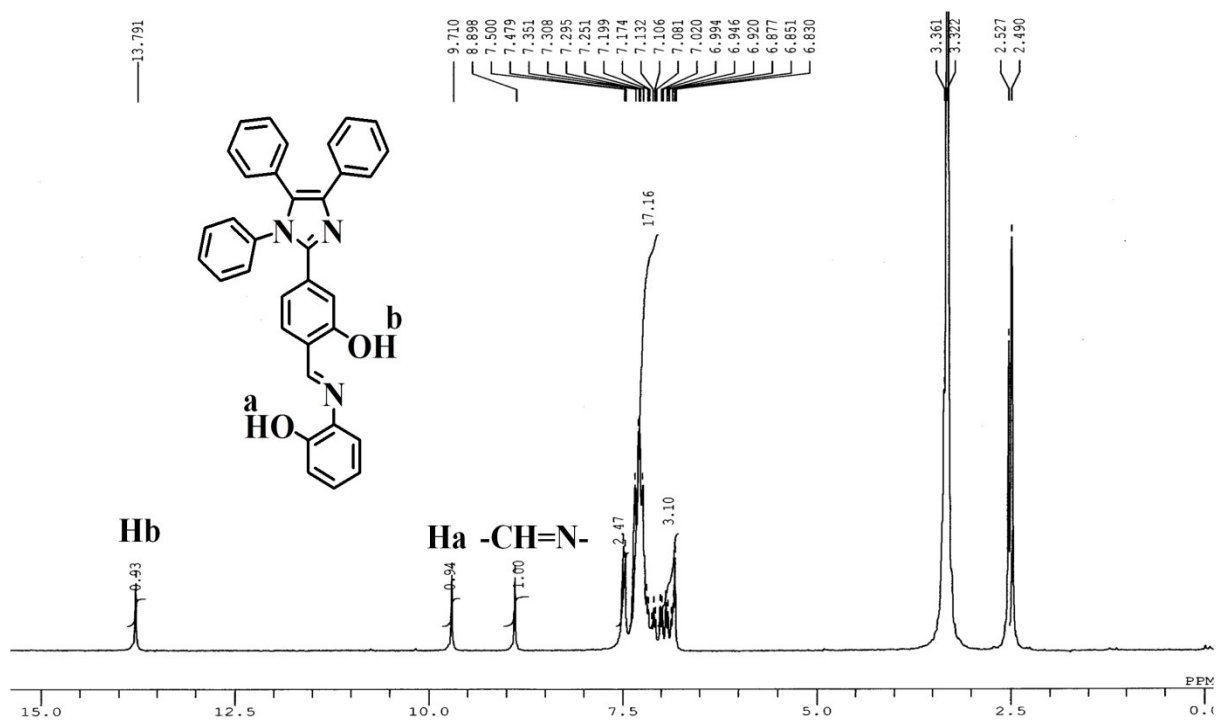

**Figure S7:** <sup>1</sup>H NMR spectrum of **3** in DMSO-*d*<sub>6</sub>.

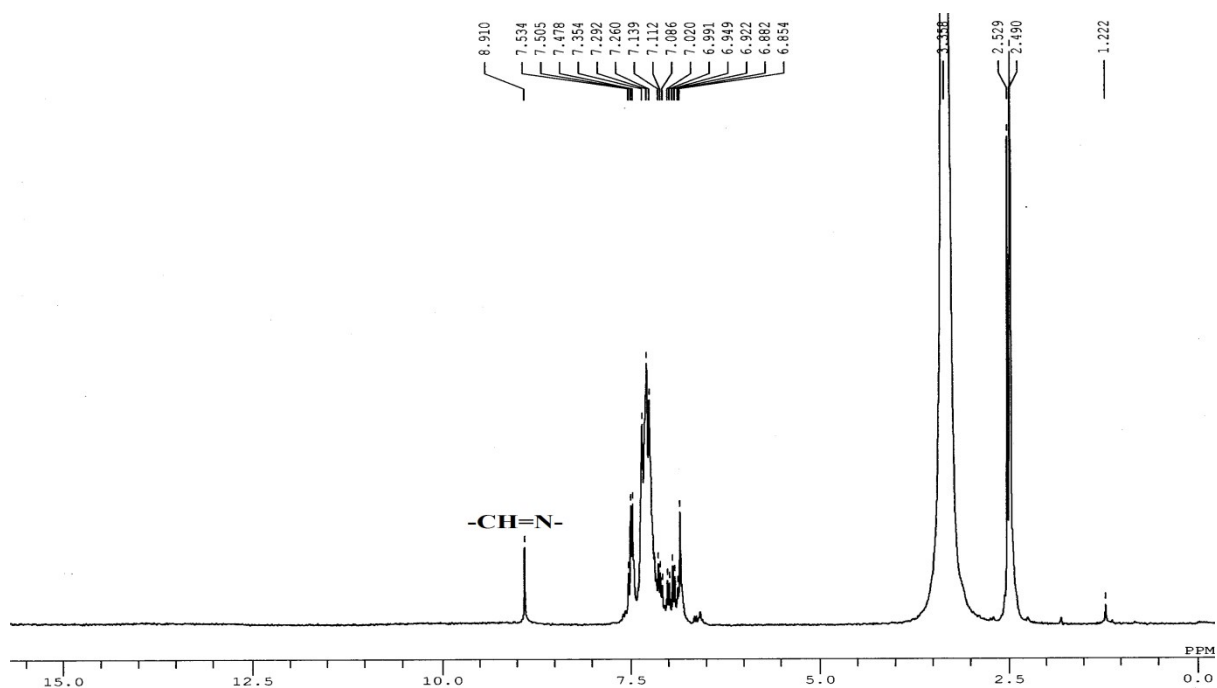

**Figure S8:** D<sub>2</sub>O exchange <sup>1</sup>H NMR spectrum of **3** in DMSO-D<sub>2</sub>O (9:1).

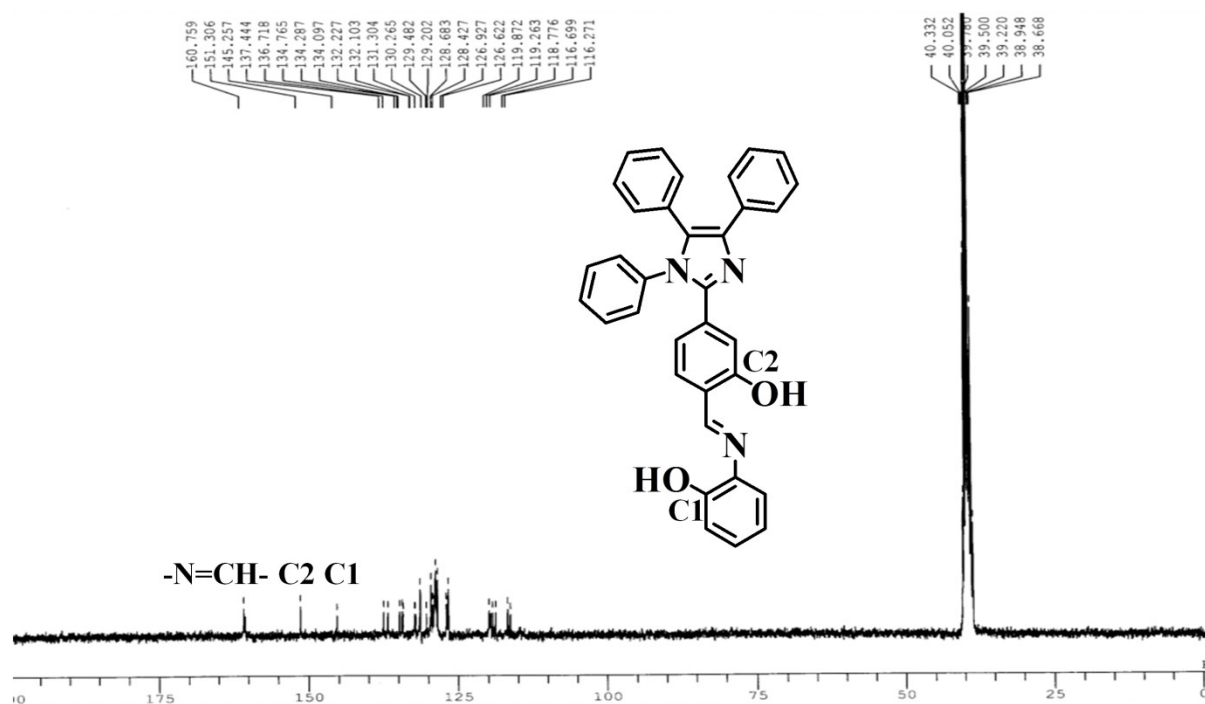

**Figure S9:**  $^{13}\text{C}$  NMR spectrum of 3 in  $\text{DMSO}-d_6$ .

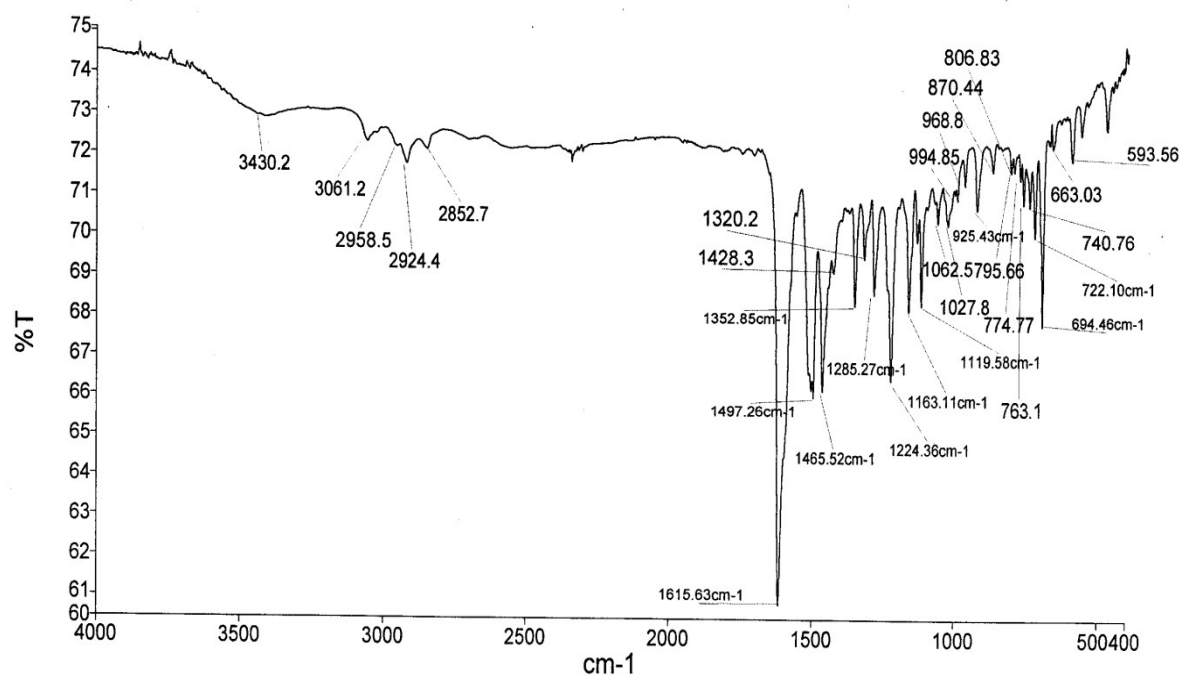

**Figure S10:** FT-IR spectrum of 3.

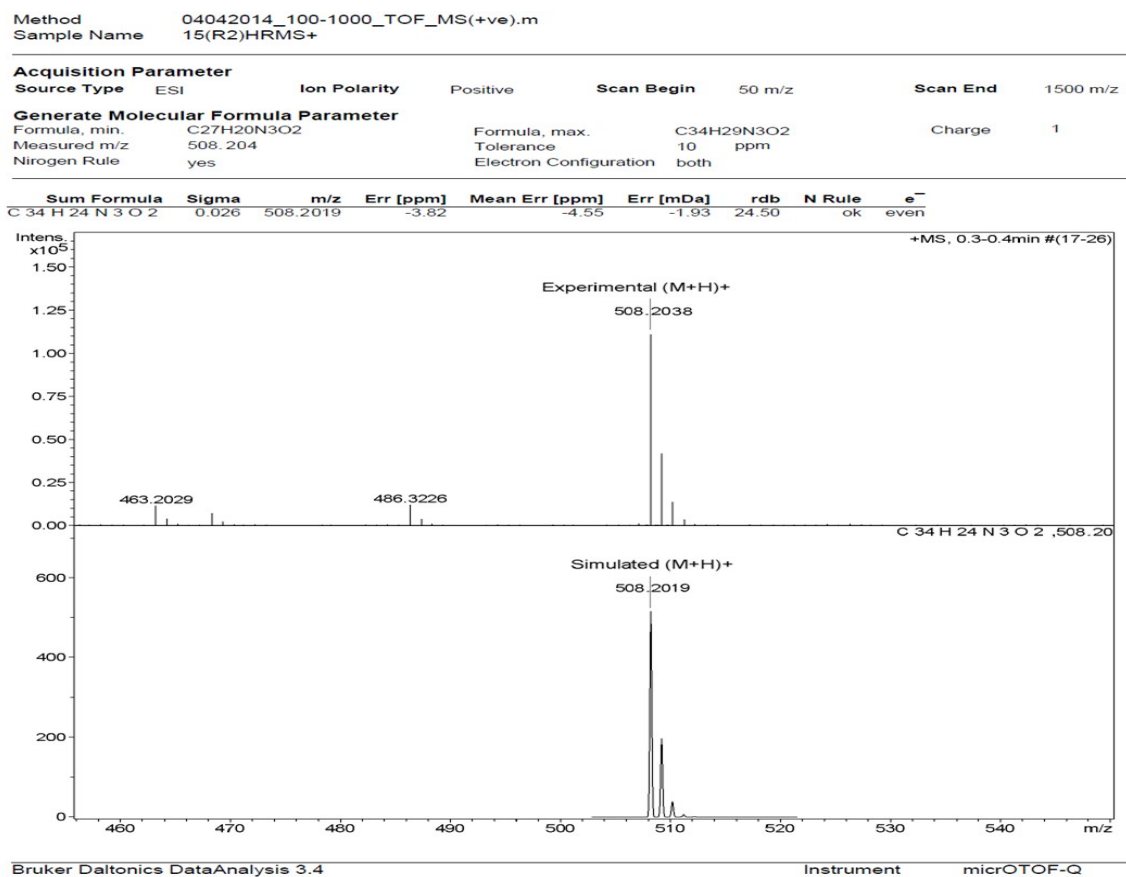

Figure S11: HRMS spectrum of **3**.

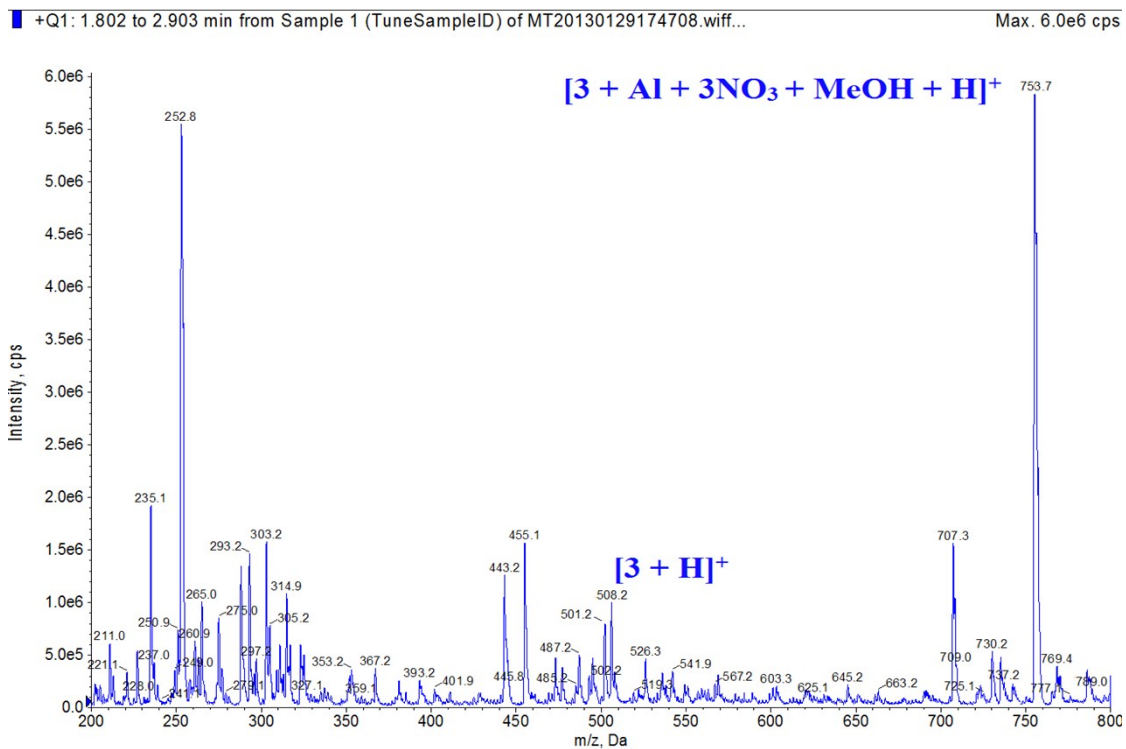

**Figure S12:** Mass spectrum of **3**+Al<sup>3+</sup> complex.

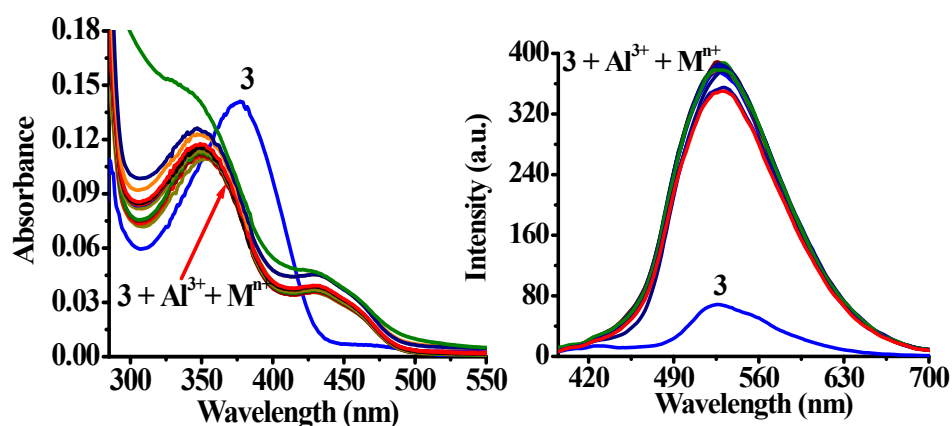

**Figure S13:** (a) Absorption and (b) emission spectra of interference studies upon addition of tested metal ions to a solution of **3**+Al<sup>3+</sup> (10  $\mu$ M) in HEPES buffer (v/v = 50%, pH 7.04).

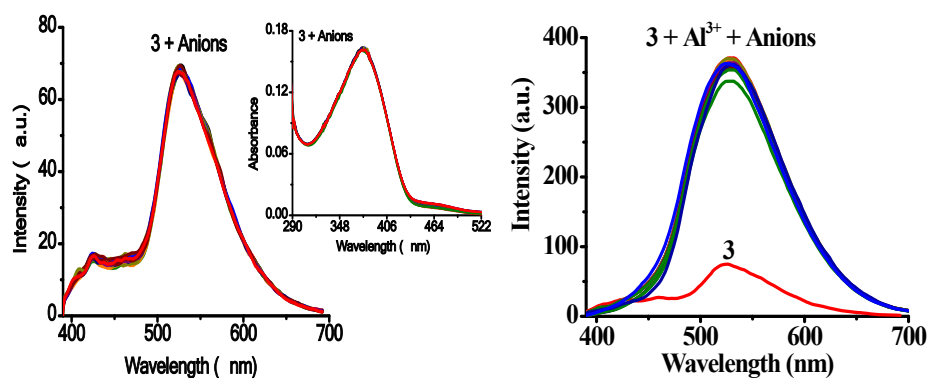

**Figure S14:** (a) Emission and Absorption (inset) spectra of **3** (10  $\mu$ M) upon interaction of various anions (50.0 equiv) in HEPES buffer (v/v = 50%, pH 7.04). (b) Emission spectra of interference studies upon addition of different anions to a solution of **3**+Al<sup>3+</sup> (10  $\mu$ M) in HEPES buffer (v/v = 50%, pH 7.04).

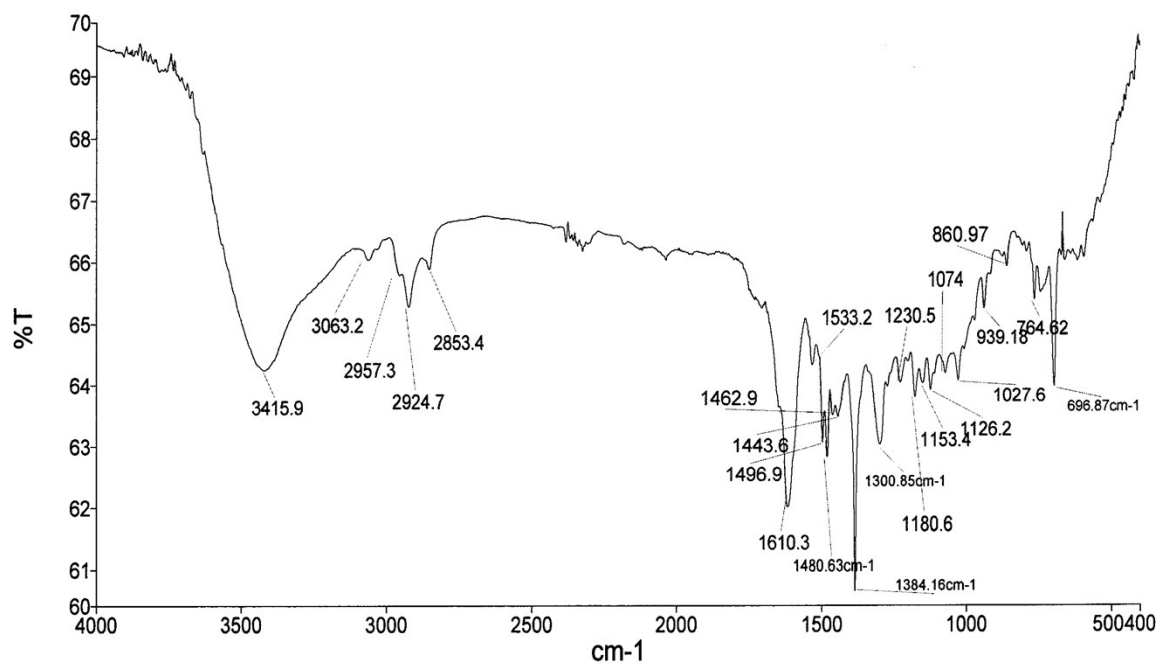

**Figure S15:** FT-IR spectrum of **3+Al<sup>3+</sup>** complex.

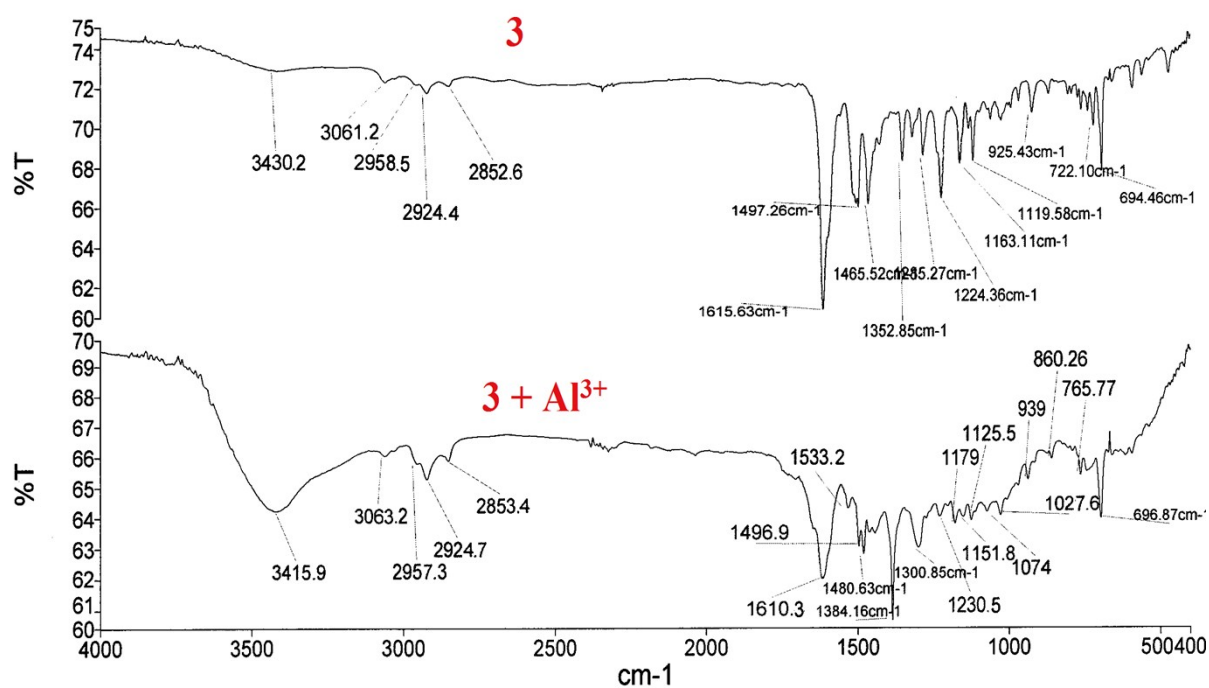

**Figure S16:** Stacked FT-IR spectrum of **3** and **3+Al<sup>3+</sup>** complex.

**Table S1:** Photophysical properties of probe **3** and **3+Al<sup>3+</sup>** in different solvents and water gradient systems

| Solvents                        | Water contents (vol %) | $\lambda_{em}$ (nm) |                          | Enhanced emission (in fold) | Quantum yield ( $\Phi$ ) |                          | Enhanced Quantum yield (in fold) |
|---------------------------------|------------------------|---------------------|--------------------------|-----------------------------|--------------------------|--------------------------|----------------------------------|
|                                 |                        | <b>3</b>            | <b>3+Al<sup>3+</sup></b> |                             | <b>3</b>                 | <b>3+Al<sup>3+</sup></b> |                                  |
| Benzene                         | 0                      | 432                 | 434                      | 5                           | 0.004                    | 0.011                    | 2.75                             |
| CCl <sub>4</sub>                | 0                      | 432                 | 434                      | 5                           | 0.003                    | 0.01                     | 3.33                             |
| CH <sub>2</sub> Cl <sub>2</sub> | 0                      | 436                 | 484                      | 14                          | 0.009                    | 0.043                    | 4.77                             |
| Dioxane                         | 0                      | 530                 | 506                      | 11                          | 0.0029                   | 0.044                    | 15.77                            |
|                                 | 10                     | 530                 | 508                      | 13                          | 0.0044                   | 0.086                    | 19.54                            |
|                                 | 20                     | 530                 | 516                      | 8                           | 0.0048                   | 0.072                    | 15                               |
|                                 | 30                     | 530                 | 530                      | 7                           | 0.005                    | 0.061                    | 12.2                             |
|                                 | 40                     | 530                 | 532                      | 8                           | 0.0059                   | 0.077                    | 13.05                            |
|                                 | 50                     | 530                 | 532                      | 8                           | 0.006                    | 0.084                    | 14                               |
|                                 | 60                     | 528                 | 536                      | 8                           | 0.0054                   | 0.092                    | 17                               |
|                                 | 70                     | 526                 | 536                      | 8                           | 0.004                    | 0.051                    | 12.75                            |
| THF                             | 0                      | 528                 | 466                      | 22                          | 0.0028                   | 0.068                    | 24.28                            |
|                                 | 10                     | 528                 | 502                      | 10                          | 0.0043                   | 0.088                    | 20.46                            |
|                                 | 20                     | 530                 | 504                      | 7                           | 0.0045                   | 0.07                     | 15.55                            |
|                                 | 30                     | 528                 | 514                      | 6                           | 0.005                    | 0.067                    | 13.4                             |
|                                 | 40                     | 528                 | 526                      | 6                           | 0.0054                   | 0.063                    | 11.66                            |
|                                 | 50                     | 528                 | 528                      | 6                           | 0.006                    | 0.07                     | 11.66                            |
|                                 | 60                     | 530                 | 530                      | 5                           | 0.007                    | 0.059                    | 8.42                             |
|                                 | 70                     | 530                 | 530                      | 5                           | -                        | -                        | -                                |
| ACN                             | 0                      | 532                 | 546                      | 5                           | 0.0018                   | 0.015                    | 8.33                             |
|                                 | 10                     | 530                 | 546                      | 3                           | 0.0021                   | 0.033                    | 15.71                            |
|                                 | 20                     | 526                 | 538                      | 5                           | 0.0027                   | 0.054                    | 20                               |
|                                 | 30                     | 526                 | 530                      | 8                           | 0.0029                   | 0.07                     | 24.13                            |
|                                 | 40                     | 526                 | 532                      | 10                          | 0.0035                   | 0.078                    | 22.28                            |
|                                 | 50                     | 524                 | 534                      | 11                          | 0.0038                   | 0.083                    | 21.84                            |
|                                 | 60                     | 522                 | 536                      | 13                          | 0.004                    | 0.046                    | 11.5                             |
|                                 | 70                     | 536                 | 536                      | 14                          | 0.0019                   | 0.027                    | 14.21                            |
| EtOH                            | 0                      | 524                 | 532                      | 6                           | 0.01                     | 0.102                    | 10.2                             |
|                                 | 10                     | 524                 | 533                      | 7                           | 0.098                    | 0.108                    | 1.10                             |
|                                 | 20                     | 522                 | 530                      | 7                           | 0.097                    | 0.125                    | 1.28                             |
|                                 | 30                     | 522                 | 530                      | 7                           | 0.097                    | 0.109                    | 1.12                             |
|                                 | 40                     | 522                 | 532                      | 7                           | 0.098                    | 0.109                    | 1.11                             |
|                                 | 50                     | 524                 | 532                      | 7                           | 0.008                    | 0.087                    | 10.87                            |
|                                 | 60                     | 526                 | 532                      | 8                           | 0.0068                   | 0.094                    | 13.82                            |
|                                 | 70                     | 527                 | 532                      | 9                           | 0.0076                   | 0.067                    | 8.81                             |
